# Supplementary material for: DNA passes through cohesin’s hinge as well as its Smc3–kleisin interface
Source: eLife journal article supplement (doi:10.7554/elife.80310), 2022-08-30
Supplement: data1 [file Figure 1 - figure supplement 1C repeat 1 - source data.xls]

## Sheet: Row 1 - Row 9
User: USER			Path: C:\Program Files\BMG\PHERAstar\User\Data\							Test ID: 1925
Test Name: KASIA								Date: 23/04/2022		Time: 16:06:27
Absorbance			Absorbance values are displayed as OD
Content		Sample X10	Sample X11	Sample X12	Sample X13	Sample X14	Sample X15	Sample X16	Sample X17	Sample X18
Well Col		1	2	3	4	5	6	7	8	9
Well Row		C	C	C	C	C	C	C	C	C		WT	S1	S3	HF	S1 S3	S1 HF	S3 HF	S1 S3 HF
Raw Data (360) 1 - 0 min	0	1.6178	1.747	1.7097	1.6724	1.695	1.6665	1.7218	1.6212	1.6635	0	0.1292	0.0919	0.0546	0.0772	0.0487	0.104	0.0034	0.0457
Raw Data (360) 2 - 0 min 30 s	0.5	1.6205	1.7359	1.7194	1.6889	1.7159	1.6705	1.7539	1.6291	1.6748	0.5	0.1154	0.0989	0.0684	0.0954	0.05	0.1334	0.0086	0.0543
Raw Data (360) 3 - 1 min	1	1.6239	1.7662	1.7429	1.7104	1.737	1.6846	1.7779	1.6548	1.6921	1	0.1423	0.119	0.0865	0.1131	0.0607	0.154	0.0309	0.0682
Raw Data (360) 4 - 1 min 30 s	1.5	1.6393	1.8003	1.7771	1.7386	1.7791	1.708	1.817	1.6764	1.7238	1.5	0.161	0.1378	0.0993	0.1398	0.0687	0.1777	0.0371	0.0845
Raw Data (360) 5 - 2 min	2	1.6401	1.8249	1.7876	1.7496	1.7985	1.714	1.8393	1.6878	1.7295	2	0.1848	0.1475	0.1095	0.1584	0.0739	0.1992	0.0477	0.0894
Raw Data (360) 6 - 2 min 30 s	2.5	1.651	1.8635	1.8213	1.7808	1.8316	1.7398	1.8677	1.7148	1.7512	2.5	0.2125	0.1703	0.1298	0.1806	0.0888	0.2167	0.0638	0.1002
Raw Data (360) 7 - 3 min	3	1.6506	1.891	1.8567	1.7972	1.8642	1.7562	1.8915	1.7306	1.7635	3	0.2404	0.2061	0.1466	0.2136	0.1056	0.2409	0.08	0.1129
Raw Data (360) 8 - 3 min 30 s	3.5	1.6599	1.9332	1.9152	1.8161	1.8952	1.7711	1.9221	1.759	1.7926	3.5	0.2733	0.2553	0.1562	0.2353	0.1112	0.2622	0.0991	0.1327			WT	S1	S3	HF	S1 S3	S1 HF	S3 HF	S1 S3 HF
Raw Data (360) 9 - 4 min	4	1.6639	1.9644	1.9727	1.8373	1.9305	1.7816	1.9387	1.7765	1.8037	4	0.3005	0.3088	0.1734	0.2666	0.1177	0.2748	0.1126	0.1398		Abs/s	0.00111767	0.000750667	0.000680333	0.0009495	0.000605667	0.000775	0.000774167	0.000578167	Change in absorbance per s between 5 and 15mins
Raw Data (360) 10 - 4 min 30 s	4.5	1.6699	2.0013	2.0197	1.8599	1.9569	1.8073	1.9723	1.8021	1.8264	4.5	0.3314	0.3498	0.19	0.287	0.1374	0.3024	0.1322	0.1565		M/s	0.111767	0.0750667	0.0680333	0.09495	0.0605667	0.0775	0.0774167	0.0578167	convert absorbance to molarity
Raw Data (360) 11 - 5 min	5	1.6763	2.0263	2.0558	1.8742	1.9894	1.8149	1.9874	1.8199	1.8345	5	0.35	0.3795	0.1979	0.3131	0.1386	0.3111	0.1436	0.1582		ATP/s	2.23533	1.50133	1.36067	1.899	1.21133	1.55	1.54833	1.15633	divide by concentration of cohesin
Raw Data (360) 12 - 5 min 30 s	5.5	1.6685	2.067	2.0782	1.8982	2.0208	1.8303	2.0211	1.8503	1.8513	5.5	0.3985	0.4097	0.2297	0.3523	0.1618	0.3526	0.1818	0.1828
Raw Data (360) 13 - 6 min	6	1.6693	2.0956	2.0782	1.9147	2.0445	1.8457	2.0439	1.8612	1.869	6	0.4263	0.4089	0.2454	0.3752	0.1764	0.3746	0.1919	0.1997
Raw Data (360) 14 - 6 min 30 s	6.5	1.6713	2.1259	2.0885	1.9253	2.0766	1.8585	2.0656	1.8744	1.8732	6.5	0.4546	0.4172	0.254	0.4053	0.1872	0.3943	0.2031	0.2019
Raw Data (360) 15 - 7 min	7	1.6766	2.1712	2.1052	1.9541	2.1149	1.8768	2.0994	1.9093	1.9011	7	0.4946	0.4286	0.2775	0.4383	0.2002	0.4228	0.2327	0.2245
Raw Data (360) 16 - 7 min 30 s	7.5	1.6789	2.2108	2.1182	1.972	2.1385	1.8899	2.1166	1.9247	1.9118	7.5	0.5319	0.4393	0.2931	0.4596	0.211	0.4377	0.2458	0.2329
Raw Data (360) 17 - 8 min	8	1.6785	2.2454	2.1416	1.9997	2.172	1.9128	2.1429	1.9498	1.9365	8	0.5669	0.4631	0.3212	0.4935	0.2343	0.4644	0.2713	0.258
Raw Data (360) 18 - 8 min 30 s	8.5	1.6807	2.2842	2.1579	2.0183	2.2071	1.9215	2.1643	1.9802	1.9519	8.5	0.6035	0.4772	0.3376	0.5264	0.2408	0.4836	0.2995	0.2712
Raw Data (360) 19 - 9 min	9	1.676	2.3056	2.1825	2.0355	2.2287	1.9377	2.1868	1.9937	1.9636	9	0.6296	0.5065	0.3595	0.5527	0.2617	0.5108	0.3177	0.2876
Raw Data (360) 20 - 9 min 30 s	9.5	1.6782	2.3362	2.2027	2.0509	2.2608	1.9492	2.2039	2.0148	1.9717	9.5	0.658	0.5245	0.3727	0.5826	0.271	0.5257	0.3366	0.2935
Raw Data (360) 21 - 10 min	10	1.6774	2.3797	2.2396	2.0764	2.2892	1.9761	2.2346	2.0412	1.9967	10	0.7023	0.5622	0.399	0.6118	0.2987	0.5572	0.3638	0.3193
Raw Data (360) 22 - 10 min 30 s	10.5	1.6735	2.4065	2.2521	2.0962	2.312	2.0063	2.2526	2.0599	2.0095	10.5	0.733	0.5786	0.4227	0.6385	0.3328	0.5791	0.3864	0.336
Raw Data (360) 23 - 11 min	11	1.6744	2.4521	2.2883	2.1151	2.3524	2.0396	2.2759	2.0883	2.0297	11	0.7777	0.6139	0.4407	0.678	0.3652	0.6015	0.4139	0.3553
Raw Data (360) 24 - 11 min 30 s	11.5	1.6689	2.4701	2.3148	2.1241	2.3702	2.0494	2.2883	2.105	2.0411	11.5	0.8012	0.6459	0.4552	0.7013	0.3805	0.6194	0.4361	0.3722
Raw Data (360) 25 - 12 min	12	1.6723	2.5115	2.338	2.1492	2.4013	2.0665	2.32	2.1344	2.0625	12	0.8392	0.6657	0.4769	0.729	0.3942	0.6477	0.4621	0.3902
Raw Data (360) 26 - 12 min 30 s	12.5	1.6683	2.5419	2.3682	2.1719	2.4224	2.0767	2.3479	2.1601	2.0806	12.5	0.8736	0.6999	0.5036	0.7541	0.4084	0.6796	0.4918	0.4123
Raw Data (360) 27 - 13 min	13	1.6711	2.5615	2.3891	2.1916	2.4494	2.0711	2.3641	2.1804	2.0958	13	0.8904	0.718	0.5205	0.7783	0.4	0.693	0.5093	0.4247
Raw Data (360) 28 - 13 min 30 s	13.5	1.6767	2.6041	2.4254	2.219	2.4852	2.0922	2.3912	2.2079	2.1234	13.5	0.9274	0.7487	0.5423	0.8085	0.4155	0.7145	0.5312	0.4467
Raw Data (360) 29 - 14 min	14	1.6714	2.6263	2.4466	2.2332	2.4999	2.1153	2.3971	2.2275	2.1353	14	0.9549	0.7752	0.5618	0.8285	0.4439	0.7257	0.5561	0.4639
Raw Data (360) 30 - 14 min 30 s	14.5	1.668	2.6579	2.4706	2.2509	2.5239	2.1361	2.4255	2.2576	2.1539	14.5	0.9899	0.8026	0.5829	0.8559	0.4681	0.7575	0.5896	0.4859
Raw Data (360) 31 - 15 min	15	1.6649	2.6855	2.4948	2.271	2.5477	2.1669	2.441	2.273	2.17	15	1.0206	0.8299	0.6061	0.8828	0.502	0.7761	0.6081	0.5051
Raw Data (360) 32 - 15 min 30 s	15.5	1.6602	2.7084	2.5207	2.2883	2.5673	2.1983	2.4585	2.2951	2.1825
Raw Data (360) 33 - 16 min	16	1.6658	2.7419	2.5449	2.3105	2.6019	2.2205	2.4818	2.3192	2.2045
Raw Data (360) 34 - 16 min 30 s	16.5	1.6626	2.7648	2.5777	2.3337	2.6236	2.2365	2.505	2.3464	2.2188
Raw Data (360) 35 - 17 min	17	1.6565	2.7834	2.5918	2.3542	2.6395	2.2318	2.5136	2.3656	2.2361
Raw Data (360) 36 - 17 min 30 s	17.5	1.6626	2.8186	2.6203	2.3759	2.6619	2.2299	2.538	2.3948	2.2609
Raw Data (360) 37 - 18 min	18	1.6528	2.8305	2.6405	2.3863	2.6759	2.2322	2.5448	2.4077	2.2698
Raw Data (360) 38 - 18 min 30 s	18.5	1.6503	2.8494	2.6626	2.4047	2.6915	2.2347	2.5644	2.4326	2.2904
Raw Data (360) 39 - 19 min	19	1.6508	2.8803	2.6796	2.4201	2.7125	2.247	2.5898	2.4594	2.3133
Raw Data (360) 40 - 19 min 30 s	19.5	1.6514	2.9052	2.711	2.4561	2.7428	2.2594	2.6004	2.4829	2.3313
Raw Data (360) 41 - 20 min	20	1.651	2.9155	2.723	2.4624	2.7502	2.2663	2.6121	2.4972	2.3367
Raw Data (360) 42 - 20 min 30 s	20.5	1.6476	2.937	2.756	2.4822	2.7782	2.2819	2.6298	2.5189	2.3601
Raw Data (360) 43 - 21 min	21	1.6466	2.9554	2.7712	2.5037	2.7861	2.2962	2.6529	2.5442	2.375
Raw Data (360) 44 - 21 min 30 s	21.5	1.6472	2.97	2.7848	2.5183	2.808	2.3083	2.6676	2.5655	2.3932
Raw Data (360) 45 - 22 min	22	1.648	2.9866	2.8059	2.539	2.8192	2.3212	2.6819	2.5836	2.4132
Raw Data (360) 46 - 22 min 30 s	22.5	1.6393	3.0039	2.8266	2.5571	2.8361	2.3275	2.6953	2.6053	2.4291
Raw Data (360) 47 - 23 min	23	1.638	3.0128	2.8375	2.5712	2.8489	2.3494	2.705	2.6238	2.4481
Raw Data (360) 48 - 23 min 30 s	23.5	1.6425	3.0355	2.858	2.5895	2.8702	2.371	2.7282	2.6446	2.4649
Raw Data (360) 49 - 24 min	24	1.6362	3.0479	2.8763	2.6162	2.8853	2.3778	2.7346	2.6639	2.4853
Raw Data (360) 50 - 24 min 30 s	24.5	1.642	3.0544	2.8772	2.6244	2.893	2.3908	2.751	2.686	2.4962
Raw Data (360) 51 - 25 min	25	1.6372	3.0729	2.9158	2.6489	2.9341	2.4173	2.7795	2.7047	2.5209
Raw Data (360) 52 - 25 min 30 s	25.5	1.6334	3.0858	2.9116	2.6557	2.9525	2.4429	2.7808	2.7201	2.5337
Raw Data (360) 53 - 26 min	26	1.6344	3.0957	2.938	2.6801	2.9545	2.4682	2.7987	2.736	2.5579
Raw Data (360) 54 - 26 min 30 s	26.5	1.6305	3.1106	2.9409	2.6901	2.9504	2.4926	2.8201	2.759	2.5692
Raw Data (360) 55 - 27 min	27	1.6312	3.1206	2.9565	2.7041	2.9552	2.5175	2.8278	2.7718	2.5863
Raw Data (360) 56 - 27 min 30 s	27.5	1.6295	3.1231	2.9684	2.7258	2.9666	2.5373	2.8515	2.7956	2.6039
Raw Data (360) 57 - 28 min	28	1.6237	3.1191	2.981	2.7364	2.9652	2.544	2.8641	2.804	2.6122
Raw Data (360) 58 - 28 min 30 s	28.5	1.6231	3.1201	2.9883	2.7429	2.9721	2.5453	2.8889	2.8227	2.6328
Raw Data (360) 59 - 29 min	29	1.6241	3.1374	2.9993	2.7583	2.9809	2.5426	2.9204	2.8349	2.6572
Raw Data (360) 60 - 29 min 30 s	29.5	1.6209	3.1559	3.0084	2.772	2.9952	2.5555	2.9469	2.8473	2.6862
Raw Data (360) 61 - 30 min	30	1.6211	3.1536	3.0155	2.7893	2.9919	2.5586	2.9592	2.8597	2.7448
Raw Data (360) 62 - 30 min 30 s	30.5	1.6209	3.1466	3.0319	2.804	3.0014	2.5698	2.9805	2.8779	2.7966
Raw Data (360) 63 - 31 min	31	1.6196	3.1547	3.032	2.82	3.0142	2.5896	3.0267	2.9027	2.8396
Raw Data (360) 64 - 31 min 30 s	31.5	1.6153	3.1539	3.0387	2.8308	3.0152	2.5888	3.0545	2.9055	2.8541
Raw Data (360) 65 - 32 min	32	1.6198	3.1489	3.0514	2.8451	3.0174	2.6126	3.0954	2.9149	2.8583
Raw Data (360) 66 - 32 min 30 s	32.5	1.6177	3.1228	3.0551	2.8583	3.0209	2.6265	3.1202	2.9214	2.8663
Raw Data (360) 67 - 33 min	33	1.6203	3.1222	3.0649	2.8596	3.0235	2.6286	3.1554	2.9335	2.8613
Raw Data (360) 68 - 33 min 30 s	33.5	1.62	3.1254	3.0698	2.8774	3.0387	2.6587	3.1937	2.9576	2.8675
Raw Data (360) 69 - 34 min	34	1.6118	3.1241	3.0713	2.8877	3.0381	2.6686	3.1898	2.9645	2.8745
Raw Data (360) 70 - 34 min 30 s	34.5	1.6172	3.1239	3.0742	2.9023	3.0505	2.6822	3.1853	2.9698	2.8885
Raw Data (360) 71 - 35 min	35	1.61	3.1115	3.0699	2.9031	3.07	2.6903	3.1889	2.965	2.881
Raw Data (360) 72 - 35 min 30 s	35.5	1.6156	3.1185	3.0845	2.924	3.0789	2.7057	3.2067	2.9831	2.9047
Raw Data (360) 73 - 36 min	36	1.6086	3.1268	3.0899	2.9282	3.0658	2.7191	3.2203	3.0013	2.9149
Raw Data (360) 74 - 36 min 30 s	36.5	1.6123	3.1407	3.0967	2.9434	3.0616	2.7286	3.2493	3.0108	2.9355
Raw Data (360) 75 - 37 min	37	1.6102	3.1287	3.0825	2.9568	3.0528	2.7386	3.2427	3.0048	2.9386
Raw Data (360) 76 - 37 min 30 s	37.5	1.608	3.125	3.0969	2.9599	3.0584	2.7514	3.2624	3.0216	2.9433
Raw Data (360) 77 - 38 min	38	1.6028	3.1266	3.0964	2.9565	3.0481	2.7558	3.2499	3.0098	2.9486
Raw Data (360) 78 - 38 min 30 s	38.5	1.6076	3.1209	3.095	2.9749	3.0571	2.7705	3.2427	3.0202	2.951
Raw Data (360) 79 - 39 min	39	1.61	3.1346	3.0987	2.9799	3.0626	2.7912	3.1807	3.0284	2.9581
Raw Data (360) 80 - 39 min 30 s	39.5	1.6072	3.1331	3.107	2.9819	3.0574	2.7955	3.1815	3.0271	2.9725
Raw Data (360) 81 - 40 min	40	1.6106	3.1392	3.103	2.9934	3.0674	2.8063	3.1912	3.0461	2.9847
Raw Data (360) 82 - 40 min 30 s	40.5	1.6044	3.1281	3.1023	2.9975	3.067	2.8231	3.2327	3.0458	2.9807
Raw Data (360) 83 - 41 min	41	1.5975	3.128	3.1068	3.0053	3.0643	2.8231	3.2611	3.0497	2.9938
Raw Data (360) 84 - 41 min 30 s	41.5	1.5994	3.1307	3.1027	3.0111	3.0659	2.8453	3.2534	3.052	2.9901
Raw Data (360) 85 - 42 min	42	1.6023	3.1306	3.104	3.0106	3.0702	2.8444	3.2543	3.0545	3.0019
Raw Data (360) 86 - 42 min 30 s	42.5	1.6037	3.1362	3.1197	3.0313	3.0859	2.866	3.2397	3.059	3.009
Raw Data (360) 87 - 43 min	43	1.5972	3.1331	3.1084	3.021	3.0725	2.8635	3.2262	3.0604	3.0073
Raw Data (360) 88 - 43 min 30 s	43.5	1.5994	3.1362	3.1122	3.0212	3.0668	2.8787	3.208	3.0586	3.0041
Raw Data (360) 89 - 44 min	44	1.6034	3.1381	3.1199	3.0368	3.0763	2.8933	3.187	3.0748	3.0206
Raw Data (360) 90 - 44 min 30 s	44.5	1.5975	3.1472	3.1212	3.0439	3.076	2.9098	3.1892	3.0722	3.0137
Raw Data (360) 91 - 45 min	45	1.5984	3.1409	3.1152	3.0389	3.091	2.9154	3.168	3.076	3.0128
Raw Data (360) 92 - 45 min 30 s	45.5	1.5911	3.1427	3.1208	3.0453	3.1148	2.9247	3.1494	3.081	3.012
Raw Data (360) 93 - 46 min	46	1.5916	3.1478	3.1169	3.0462	3.0973	2.9288	3.1482	3.0818	3.0207
Raw Data (360) 94 - 46 min 30 s	46.5	1.5916	3.1328	3.1185	3.0372	3.0809	2.9347	3.1422	3.0623	3.0247
Raw Data (360) 95 - 47 min	47	1.5953	3.1387	3.1279	3.0522	3.0863	2.9475	3.1412	3.0776	3.0323
Raw Data (360) 96 - 47 min 30 s	47.5	1.5982	3.1493	3.1283	3.0655	3.0954	2.9553	3.1382	3.0814	3.0452
Raw Data (360) 97 - 48 min	48	1.5937	3.1548	3.1342	3.0645	3.0899	2.9681	3.1436	3.0847	3.0782
Raw Data (360) 98 - 48 min 30 s	48.5	1.5899	3.1386	3.1241	3.0582	3.0935	2.9737	3.1357	3.0806	3.1114
Raw Data (360) 99 - 49 min	49	1.5919	3.1457	3.136	3.0684	3.099	2.974	3.1405	3.0789	3.1476
Raw Data (360) 100 - 49 min 30 s	49.5	1.5874	3.1478	3.1289	3.0679	3.093	2.9821	3.1318	3.0907	3.1873
Raw Data (360) 101 - 50 min	50	1.5924	3.1557	3.1309	3.0694	3.0978	2.9841	3.1276	3.0899	3.1574
Raw Data (360) 102 - 50 min 30 s	50.5	1.5916	3.1645	3.1332	3.0763	3.1001	3.0066	3.1421	3.0961	3.1057
Raw Data (360) 103 - 51 min	51	1.5887	3.1725	3.1257	3.0832	3.0949	3.0007	3.1472	3.0966	3.1028
Raw Data (360) 104 - 51 min 30 s	51.5	1.5913	3.1646	3.1341	3.0784	3.0847	3.0151	3.1387	3.095	3.1012
Raw Data (360) 105 - 52 min	52	1.5846	3.1774	3.1264	3.0739	3.0905	3.0183	3.1378	3.0941	3.0978
Raw Data (360) 106 - 52 min 30 s	52.5	1.5861	3.1792	3.1229	3.0741	3.0915	3.0153	3.1343	3.0919	3.0983
Raw Data (360) 107 - 53 min	53	1.5826	3.1921	3.1194	3.0778	3.0966	3.0157	3.1392	3.0972	3.0967
Raw Data (360) 108 - 53 min 30 s	53.5	1.5899	3.2033	3.1251	3.0829	3.0995	3.0274	3.1402	3.0886	3.0955
Raw Data (360) 109 - 54 min	54	1.5879	3.2046	3.1302	3.0877	3.0927	3.0272	3.1363	3.1023	3.1025
Raw Data (360) 110 - 54 min 30 s	54.5	1.5882	3.2071	3.1344	3.0857	3.1001	3.0358	3.1406	3.103	3.1169
Raw Data (360) 111 - 55 min	55	1.584	3.194	3.1354	3.0774	3.1084	3.0319	3.1302	3.0953	3.0934
Raw Data (360) 112 - 55 min 30 s	55.5	1.5822	3.2008	3.1294	3.0768	3.1299	3.0279	3.1399	3.0998	3.0952
Raw Data (360) 113 - 56 min	56	1.584	3.1987	3.1253	3.0811	3.1198	3.0405	3.1427	3.1003	3.103
Raw Data (360) 114 - 56 min 30 s	56.5	1.5828	3.1934	3.1354	3.0878	3.1008	3.0391	3.1501	3.0957	3.102
Raw Data (360) 115 - 57 min	57	1.5886	3.196	3.146	3.0931	3.1113	3.0546	3.1497	3.1081	3.1498
Raw Data (360) 116 - 57 min 30 s	57.5	1.587	3.1931	3.1433	3.0872	3.1131	3.0548	3.1512	3.1064	3.1518
Raw Data (360) 117 - 58 min	58	1.5818	3.1941	3.1369	3.0867	3.1128	3.0602	3.1482	3.1117	3.1665
Raw Data (360) 118 - 58 min 30 s	58.5	1.5768	3.1841	3.1225	3.0773	3.0931	3.0513	3.1361	3.0926	3.1561
Raw Data (360) 119 - 59 min	59	1.5828	3.1824	3.1395	3.0886	3.1143	3.0581	3.1495	3.1015	3.176
Raw Data (360) 120 - 59 min 30 s	59.5	1.5806	3.1862	3.1365	3.0968	3.1052	3.0594	3.1516	3.1078	3.1909
