# Supplementary material for: DNA passes through cohesin’s hinge as well as its Smc3–kleisin interface
Source: eLife journal article supplement (doi:10.7554/elife.80310), 2022-08-30
Supplement: data1 [file Figure 1 - figure supplement 1C repeat 2 - source data.xls]

## Sheet: Row 1 - Row 9
User: USER			Path: C:\Program Files\BMG\PHERAstar\User\Data\							Test ID: 1925
Test Name: KASIA								Date: 23/04/2022		Time: 16:06:27
Absorbance			Absorbance values are displayed as OD
Content		Sample X10	Sample X11	Sample X12	Sample X13	Sample X14	Sample X15	Sample X16	Sample X17	Sample X18
Well Col		1	2	3	4	5	6	7	8	9
Well Row		C	C	C	C	C	C	C	C	C		WT	S1	S3	HF	S1 S3	S1 HF	S3 HF	S1 S3 HF
Raw Data (360) 1 - 0 min	0	1.6406	1.7304	1.7362	1.6958	1.6769	1.582	1.627	1.5771	1.6378	0	0.0898	0.0956	0.0552	0.0363	-0.0586	-0.0136	-0.0635	-0.0028
Raw Data (360) 2 - 0 min 30 s	0.5	1.6239	1.7573	1.7617	1.6897	1.7074	1.608	1.6454	1.5955	1.6543	0.5	0.1334	0.1378	0.0658	0.0835	-0.0159	0.0215	-0.0284	0.0304
Raw Data (360) 3 - 1 min	1	1.6276	1.7939	1.789	1.7105	1.7416	1.6315	1.6794	1.6191	1.6759	1	0.1663	0.1614	0.0829	0.114	0.0039	0.0518	-0.0085	0.0483
Raw Data (360) 4 - 1 min 30 s	1.5	1.6195	1.8282	1.8198	1.7294	1.7746	1.6444	1.7022	1.6512	1.6886	1.5	0.2087	0.2003	0.1099	0.1551	0.0249	0.0827	0.0317	0.0691
Raw Data (360) 5 - 2 min	2	1.6196	1.8633	1.8376	1.7491	1.8224	1.6661	1.735	1.6776	1.7073	2	0.2437	0.218	0.1295	0.2028	0.0465	0.1154	0.058	0.0877
Raw Data (360) 6 - 2 min 30 s	2.5	1.6174	1.8999	1.8636	1.761	1.907	1.6859	1.7607	1.6966	1.7255	2.5	0.2825	0.2462	0.1436	0.2896	0.0685	0.1433	0.0792	0.1081
Raw Data (360) 7 - 3 min	3	1.6198	1.9367	1.8887	1.7826	1.9679	1.706	1.7972	1.7204	1.7507	3	0.3169	0.2689	0.1628	0.3481	0.0862	0.1774	0.1006	0.1309
Raw Data (360) 8 - 3 min 30 s	3.5	1.619	1.9688	1.915	1.8024	1.9921	1.7283	1.834	1.7435	1.761	3.5	0.3498	0.296	0.1834	0.3731	0.1093	0.215	0.1245	0.142			WT	S1	S3	HF	S1 S3	S1 HF	S3 HF	S1 S3 HF
Raw Data (360) 9 - 4 min	4	1.6136	2.0068	1.9371	1.8203	2.0167	1.7486	1.8669	1.773	1.7864	4	0.3932	0.3235	0.2067	0.4031	0.135	0.2533	0.1594	0.1728		Abs/s	0.00116617	0.000796833	0.00081	0.00111383	0.000791833	0.00105017	0.000903	0.000773167	Change in absorbance per s between 5 and 15mins
Raw Data (360) 10 - 4 min 30 s	4.5	1.6178	2.046	1.9694	1.8444	2.0192	1.7763	1.9027	1.7949	1.8055	4.5	0.4282	0.3516	0.2266	0.4014	0.1585	0.2849	0.1771	0.1877		M/s	0.116617	0.0796833	0.081	0.111383	0.0791833	0.105017	0.0903	0.0773167	convert absorbance to molarity
Raw Data (360) 11 - 5 min	5	1.6276	2.0853	1.9972	1.8746	2.0523	1.8024	1.94	1.8253	1.839	5	0.4577	0.3696	0.247	0.4247	0.1748	0.3124	0.1977	0.2114		ATP/s	2.33233	1.59367	1.62	2.22767	1.58367	2.10033	1.806	1.54633	divide by concentration of cohesin
Raw Data (360) 12 - 5 min 30 s	5.5	1.6156	2.1155	2.0235	1.8933	2.0873	1.8182	1.9617	1.8431	1.8538	5.5	0.4999	0.4079	0.2777	0.4717	0.2026	0.3461	0.2275	0.2382
Raw Data (360) 13 - 6 min	6	1.6112	2.1529	2.0398	1.9236	2.1157	1.8425	1.9923	1.8654	1.873	6	0.5417	0.4286	0.3124	0.5045	0.2313	0.3811	0.2542	0.2618
Raw Data (360) 14 - 6 min 30 s	6.5	1.6165	2.1935	2.0674	1.9492	2.1574	1.8657	2.036	1.8965	1.8966	6.5	0.577	0.4509	0.3327	0.5409	0.2492	0.4195	0.28	0.2801
Raw Data (360) 15 - 7 min	7	1.6106	2.2248	2.0906	1.9606	2.1842	1.8898	2.0596	1.9163	1.918	7	0.6142	0.48	0.35	0.5736	0.2792	0.449	0.3057	0.3074
Raw Data (360) 16 - 7 min 30 s	7.5	1.6157	2.2695	2.1179	1.9854	2.2308	1.9146	2.098	1.9456	1.9387	7.5	0.6538	0.5022	0.3697	0.6151	0.2989	0.4823	0.3299	0.323
Raw Data (360) 17 - 8 min	8	1.6159	2.2979	2.1462	2.0012	2.2653	1.9332	2.1293	1.9753	1.9628	8	0.682	0.5303	0.3853	0.6494	0.3173	0.5134	0.3594	0.3469
Raw Data (360) 18 - 8 min 30 s	8.5	1.6112	2.3402	2.1708	2.0261	2.2983	1.9527	2.1559	2.0011	1.9878	8.5	0.729	0.5596	0.4149	0.6871	0.3415	0.5447	0.3899	0.3766
Raw Data (360) 19 - 9 min	9	1.6173	2.3738	2.1918	2.0551	2.3372	1.9802	2.1903	2.0248	2.0077	9	0.7565	0.5745	0.4378	0.7199	0.3629	0.573	0.4075	0.3904
Raw Data (360) 20 - 9 min 30 s	9.5	1.6099	2.4086	2.2122	2.0713	2.3684	1.9977	2.2192	2.0522	2.025	9.5	0.7987	0.6023	0.4614	0.7585	0.3878	0.6093	0.4423	0.4151
Raw Data (360) 21 - 10 min	10	1.6117	2.4466	2.2402	2.0996	2.4023	2.023	2.2591	2.087	2.0509	10	0.8349	0.6285	0.4879	0.7906	0.4113	0.6474	0.4753	0.4392
Raw Data (360) 22 - 10 min 30 s	10.5	1.611	2.4726	2.2613	2.1203	2.4261	2.0455	2.2869	2.1412	2.075	10.5	0.8616	0.6503	0.5093	0.8151	0.4345	0.6759	0.5302	0.464
Raw Data (360) 23 - 11 min	11	1.6117	2.5205	2.2834	2.1462	2.4579	2.0674	2.3103	2.2289	2.0923	11	0.9088	0.6717	0.5345	0.8462	0.4557	0.6986	0.6172	0.4806
Raw Data (360) 24 - 11 min 30 s	11.5	1.614	2.5473	2.307	2.1747	2.4904	2.0974	2.3464	2.3678	2.1253	11.5	0.9333	0.693	0.5607	0.8764	0.4834	0.7324	0.7538	0.5113
Raw Data (360) 25 - 12 min	12	1.6125	2.5807	2.3296	2.1965	2.5244	2.1105	2.371	2.485	2.1401	12	0.9682	0.7171	0.584	0.9119	0.498	0.7585	0.8725	0.5276
Raw Data (360) 26 - 12 min 30 s	12.5	1.6095	2.6152	2.3541	2.2156	2.567	2.1389	2.4081	2.5311	2.1642	12.5	1.0057	0.7446	0.6061	0.9575	0.5294	0.7986	0.9216	0.5547
Raw Data (360) 27 - 13 min	13	1.6085	2.6432	2.3777	2.2378	2.5948	2.1614	2.431	2.4873	2.189	13	1.0347	0.7692	0.6293	0.9863	0.5529	0.8225	0.8788	0.5805
Raw Data (360) 28 - 13 min 30 s	13.5	1.6085	2.6728	2.3922	2.2607	2.6079	2.1783	2.4551	2.4236	2.2101	13.5	1.0643	0.7837	0.6522	0.9994	0.5698	0.8466	0.8151	0.6016
Raw Data (360) 29 - 14 min	14	1.6039	2.6974	2.4127	2.2853	2.6432	2.2033	2.4878	2.3648	2.2338	14	1.0935	0.8088	0.6814	1.0393	0.5994	0.8839	0.7609	0.6299
Raw Data (360) 30 - 14 min 30 s	14.5	1.6091	2.7315	2.4399	2.3175	2.6792	2.2315	2.52	2.3361	2.2588	14.5	1.1224	0.8308	0.7084	1.0701	0.6224	0.9109	0.727	0.6497
Raw Data (360) 31 - 15 min	15	1.6049	2.7623	2.4526	2.3379	2.6979	2.2548	2.5474	2.3444	2.2802	15	1.1574	0.8477	0.733	1.093	0.6499	0.9425	0.7395	0.6753
Raw Data (360) 32 - 15 min 30 s	15.5	1.6073	2.7907	2.4834	2.3613	2.7291	2.2783	2.5775	2.3721	2.3121
Raw Data (360) 33 - 16 min	16	1.6033	2.8173	2.4991	2.389	2.7464	2.3013	2.6002	2.387	2.3317
Raw Data (360) 34 - 16 min 30 s	16.5	1.6038	2.8367	2.5151	2.4079	2.7706	2.3152	2.6184	2.4058	2.3504
Raw Data (360) 35 - 17 min	17	1.6035	2.8653	2.5442	2.4305	2.7977	2.3484	2.6482	2.4457	2.3769
Raw Data (360) 36 - 17 min 30 s	17.5	1.6037	2.8817	2.5555	2.4504	2.8179	2.3636	2.6726	2.4587	2.3981
Raw Data (360) 37 - 18 min	18	1.6084	2.9067	2.5762	2.4759	2.8384	2.3888	2.6972	2.4978	2.4183
Raw Data (360) 38 - 18 min 30 s	18.5	1.6083	2.9369	2.6007	2.5018	2.8582	2.4164	2.7208	2.5153	2.445
Raw Data (360) 39 - 19 min	19	1.6096	2.9448	2.6172	2.5279	2.8795	2.4366	2.7466	2.5354	2.464
Raw Data (360) 40 - 19 min 30 s	19.5	1.6105	2.9674	2.6374	2.5478	2.8973	2.4599	2.7714	2.5631	2.4864
Raw Data (360) 41 - 20 min	20	1.6062	2.9728	2.6504	2.5565	2.9101	2.4762	2.7794	2.5777	2.5038
Raw Data (360) 42 - 20 min 30 s	20.5	1.6086	2.9897	2.6672	2.5886	2.9212	2.4939	2.8061	2.5971	2.5292
Raw Data (360) 43 - 21 min	21	1.6084	3.0004	2.6781	2.6053	2.9445	2.5149	2.8293	2.6337	2.5532
Raw Data (360) 44 - 21 min 30 s	21.5	1.6133	3.0276	2.7095	2.6322	2.9665	2.5483	2.8553	2.66	2.577
Raw Data (360) 45 - 22 min	22	1.6085	3.0318	2.7147	2.641	2.9671	2.5669	2.8589	2.6711	2.5946
Raw Data (360) 46 - 22 min 30 s	22.5	1.6109	3.0489	2.7378	2.6674	2.9923	2.5875	2.8868	2.6982	2.6197
Raw Data (360) 47 - 23 min	23	1.611	3.0608	2.7427	2.6839	2.9943	2.6008	2.9066	2.7227	2.6322
Raw Data (360) 48 - 23 min 30 s	23.5	1.6095	3.0606	2.7556	2.705	2.9991	2.6251	2.9175	2.7421	2.6594
Raw Data (360) 49 - 24 min	24	1.6053	3.0646	2.7653	2.7203	3.0153	2.6377	2.9255	2.7411	2.6682
Raw Data (360) 50 - 24 min 30 s	24.5	1.608	3.0831	2.7879	2.7445	3.0349	2.6682	2.9559	2.7829	2.6946
Raw Data (360) 51 - 25 min	25	1.6116	3.0951	2.8124	2.7701	3.0395	2.6925	2.964	2.7987	2.7127
Raw Data (360) 52 - 25 min 30 s	25.5	1.6084	3.0974	2.825	2.7847	3.0483	2.7047	2.9818	2.8188	2.7263
Raw Data (360) 53 - 26 min	26	1.6128	3.0967	2.8241	2.7921	3.0519	2.7202	2.9907	2.8223	2.746
Raw Data (360) 54 - 26 min 30 s	26.5	1.6101	3.11	2.8419	2.818	3.0669	2.7405	3.0062	2.842	2.7653
Raw Data (360) 55 - 27 min	27	1.6037	3.1065	2.8495	2.8333	3.0603	2.7489	3.0129	2.8491	2.7801
Raw Data (360) 56 - 27 min 30 s	27.5	1.6046	3.1117	2.8623	2.8396	3.0654	2.7745	3.0258	2.8761	2.7959
Raw Data (360) 57 - 28 min	28	1.6097	3.113	2.875	2.8592	3.0785	2.7907	3.022	2.886	2.8131
Raw Data (360) 58 - 28 min 30 s	28.5	1.6041	3.1253	2.8928	2.8697	3.0854	2.8113	3.0489	2.9079	2.8297
Raw Data (360) 59 - 29 min	29	1.6029	3.1177	2.9001	2.8875	3.081	2.8203	3.0436	2.9191	2.8454
Raw Data (360) 60 - 29 min 30 s	29.5	1.6007	3.1238	2.9074	2.8943	3.0914	2.8386	3.0408	2.931	2.8568
Raw Data (360) 61 - 30 min	30	1.6091	3.1215	2.908	2.9147	3.0961	2.8583	3.0546	2.9534	2.8776
Raw Data (360) 62 - 30 min 30 s	30.5	1.6023	3.1232	2.9292	2.9279	3.1015	2.8747	3.0637	2.9528	2.8898
Raw Data (360) 63 - 31 min	31	1.606	3.1281	2.9358	2.936	3.096	2.8783	3.0577	2.9695	2.9089
Raw Data (360) 64 - 31 min 30 s	31.5	1.6053	3.1314	2.9456	2.9521	3.096	2.8977	3.0622	2.9753	2.9311
Raw Data (360) 65 - 32 min	32	1.6029	3.1299	2.9491	2.9604	3.1019	2.9004	3.0769	2.9824	2.9327
Raw Data (360) 66 - 32 min 30 s	32.5	1.6043	3.1371	2.9648	2.9725	3.1085	2.9268	3.0834	2.9996	2.9567
Raw Data (360) 67 - 33 min	33	1.6046	3.1402	2.9695	2.9792	3.1054	2.9312	3.0814	3.006	2.9673
Raw Data (360) 68 - 33 min 30 s	33.5	1.6066	3.1383	2.9719	2.985	3.1046	2.9499	3.0857	3.0071	2.9778
Raw Data (360) 69 - 34 min	34	1.5982	3.1379	2.9877	2.997	3.0981	2.9506	3.0889	3.0151	2.9835
Raw Data (360) 70 - 34 min 30 s	34.5	1.602	3.1333	2.991	3.0007	3.1086	2.9678	3.0889	3.0286	2.9961
Raw Data (360) 71 - 35 min	35	1.5986	3.1261	2.991	3.0054	3.1009	2.9725	3.0851	3.0216	3.0019
Raw Data (360) 72 - 35 min 30 s	35.5	1.6059	3.1396	3.0037	3.0225	3.1129	2.9879	3.0992	3.0349	3.0102
Raw Data (360) 73 - 36 min	36	1.6041	3.1478	3.0058	3.0234	3.1142	2.996	3.0955	3.0427	3.025
Raw Data (360) 74 - 36 min 30 s	36.5	1.6039	3.1458	3.0111	3.0365	3.1093	2.9977	3.108	3.0417	3.0287
Raw Data (360) 75 - 37 min	37	1.5992	3.1368	3.0104	3.0344	3.1204	3.0027	3.1019	3.043	3.0327
Raw Data (360) 76 - 37 min 30 s	37.5	1.6031	3.1411	3.0175	3.0408	3.1101	3.0141	3.1006	3.0482	3.0393
Raw Data (360) 77 - 38 min	38	1.599	3.141	3.013	3.047	3.1101	3.0184	3.0979	3.0497	3.0364
Raw Data (360) 78 - 38 min 30 s	38.5	1.5954	3.147	3.0339	3.0479	3.1182	3.021	3.1124	3.0587	3.039
Raw Data (360) 79 - 39 min	39	1.5998	3.1421	3.0315	3.0528	3.1128	3.0366	3.1027	3.0574	3.0496
Raw Data (360) 80 - 39 min 30 s	39.5	1.6024	3.1444	3.0425	3.0716	3.1198	3.0432	3.1041	3.0622	3.0561
Raw Data (360) 81 - 40 min	40	1.5991	3.1488	3.0412	3.0674	3.1232	3.0527	3.1144	3.0782	3.06
Raw Data (360) 82 - 40 min 30 s	40.5	1.5996	3.1454	3.0395	3.0655	3.1086	3.033	3.1024	3.0554	3.0522
Raw Data (360) 83 - 41 min	41	1.5969	3.1516	3.0483	3.0699	3.1232	3.0497	3.1068	3.0712	3.0684
Raw Data (360) 84 - 41 min 30 s	41.5	1.6022	3.1418	3.051	3.0679	3.1238	3.054	3.1156	3.0663	3.0577
Raw Data (360) 85 - 42 min	42	1.594	3.145	3.049	3.0738	3.1213	3.0508	3.1119	3.0702	3.06
Raw Data (360) 86 - 42 min 30 s	42.5	1.5982	3.1432	3.0567	3.0798	3.127	3.054	3.122	3.0809	3.0709
Raw Data (360) 87 - 43 min	43	1.5978	3.1462	3.0531	3.086	3.1206	3.0716	3.1099	3.0779	3.0657
Raw Data (360) 88 - 43 min 30 s	43.5	1.5995	3.1517	3.0635	3.0862	3.1303	3.0594	3.1128	3.0759	3.066
Raw Data (360) 89 - 44 min	44	1.5995	3.1469	3.0609	3.0812	3.1215	3.0655	3.1089	3.076	3.0652
Raw Data (360) 90 - 44 min 30 s	44.5	1.6016	3.1598	3.0702	3.0866	3.1339	3.0771	3.1215	3.0882	3.0776
Raw Data (360) 91 - 45 min	45	1.5958	3.1483	3.0595	3.0831	3.1229	3.0646	3.1123	3.0771	3.0738
Raw Data (360) 92 - 45 min 30 s	45.5	1.601	3.1477	3.0635	3.0883	3.1225	3.0711	3.1172	3.0821	3.0853
Raw Data (360) 93 - 46 min	46	1.5962	3.1439	3.0695	3.0896	3.125	3.0737	3.1183	3.0834	3.0907
Raw Data (360) 94 - 46 min 30 s	46.5	1.6025	3.1475	3.0713	3.0883	3.1286	3.0764	3.1139	3.0775	3.0917
Raw Data (360) 95 - 47 min	47	1.5922	3.1523	3.0635	3.0875	3.1279	3.0697	3.1094	3.0832	3.097
Raw Data (360) 96 - 47 min 30 s	47.5	1.5973	3.1626	3.0829	3.0967	3.1326	3.08	3.1197	3.0913	3.1123
Raw Data (360) 97 - 48 min	48	1.5954	3.1458	3.0632	3.0881	3.1274	3.0747	3.1181	3.081	3.1018
Raw Data (360) 98 - 48 min 30 s	48.5	1.5891	3.1473	3.0651	3.0899	3.1215	3.0804	3.1122	3.084	3.1089
Raw Data (360) 99 - 49 min	49	1.6019	3.1546	3.0761	3.0959	3.1377	3.0799	3.1171	3.087	3.1134
Raw Data (360) 100 - 49 min 30 s	49.5	1.5991	3.1558	3.0797	3.1061	3.1404	3.0892	3.1202	3.0916	3.1211
Raw Data (360) 101 - 50 min	50	1.5934	3.1551	3.0706	3.1001	3.139	3.0847	3.1219	3.0927	3.1077
Raw Data (360) 102 - 50 min 30 s	50.5	1.6005	3.1618	3.0833	3.1061	3.1425	3.087	3.1213	3.0954	3.1022
Raw Data (360) 103 - 51 min	51	1.6033	3.1547	3.0701	3.0988	3.1305	3.0797	3.1206	3.0901	3.0972
Raw Data (360) 104 - 51 min 30 s	51.5	1.6091	3.1617	3.0832	3.106	3.1293	3.0836	3.127	3.0897	3.1009
Raw Data (360) 105 - 52 min	52	1.6232	3.1532	3.0772	3.0987	3.1336	3.0779	3.1162	3.0872	3.096
Raw Data (360) 106 - 52 min 30 s	52.5	1.6234	3.1607	3.0827	3.0945	3.1322	3.0828	3.1288	3.0865	3.0942
Raw Data (360) 107 - 53 min	53	1.6219	3.1571	3.0751	3.0958	3.1293	3.0941	3.1192	3.0852	3.0945
Raw Data (360) 108 - 53 min 30 s	53.5	1.6215	3.1559	3.078	3.0977	3.1352	3.082	3.1208	3.0919	3.0867
Raw Data (360) 109 - 54 min	54	1.6167	3.1563	3.0865	3.1041	3.1313	3.087	3.1324	3.1003	3.1017
Raw Data (360) 110 - 54 min 30 s	54.5	1.6143	3.1625	3.0914	3.1044	3.1454	3.0914	3.1236	3.0984	3.0957
Raw Data (360) 111 - 55 min	55	1.6033	3.1613	3.0917	3.1089	3.1385	3.094	3.1313	3.093	3.0938
Raw Data (360) 112 - 55 min 30 s	55.5	1.6007	3.1532	3.0848	3.0943	3.1276	3.0803	3.1208	3.0903	3.0903
Raw Data (360) 113 - 56 min	56	1.6003	3.1625	3.0961	3.1142	3.1435	3.1003	3.1324	3.0954	3.1035
Raw Data (360) 114 - 56 min 30 s	56.5	1.6097	3.1544	3.0926	3.1146	3.1392	3.0859	3.1228	3.1001	3.0975
Raw Data (360) 115 - 57 min	57	1.6039	3.1684	3.0932	3.1153	3.1533	3.1013	3.1262	3.0958	3.0985
Raw Data (360) 116 - 57 min 30 s	57.5	1.6019	3.1589	3.0893	3.1117	3.1372	3.0854	3.125	3.0853	3.0951
Raw Data (360) 117 - 58 min	58	1.6034	3.1546	3.098	3.1108	3.1329	3.0912	3.1284	3.0954	3.0973
Raw Data (360) 118 - 58 min 30 s	58.5	1.6064	3.1634	3.1029	3.1106	3.1437	3.0966	3.134	3.1039	3.1034
Raw Data (360) 119 - 59 min	59	1.6028	3.1506	3.0892	3.1106	3.127	3.0925	3.1331	3.0908	3.0963
Raw Data (360) 120 - 59 min 30 s	59.5	1.6009	3.1595	3.0974	3.1112	3.1388	3.1044	3.1246	3.1052	3.1079
