# Supplementary material for: DNA passes through cohesin’s hinge as well as its Smc3–kleisin interface
Source: eLife journal article supplement (doi:10.7554/elife.80310), 2022-08-30
Supplement: data1 [file Figure 1 - figure supplement 1C repeat 3 - source data.xls]

## Sheet: Row 1 - Row 9
User: USER			Path: C:\Program Files\BMG\PHERAstar\User\Data\							Test ID: 1925
Test Name: KASIA								Date: 23/04/2022		Time: 16:06:27
Absorbance			Absorbance values are displayed as OD
Content		Sample X10	Sample X11	Sample X12	Sample X13	Sample X14	Sample X15	Sample X16	Sample X17	Sample X18
Well Col		1	2	3	4	5	6	7	8	9
Well Row		C	C	C	C	C	C	C	C	C		WT	S1	S3	HF	S1 S3	S1 HF	S3 HF	S1 S3 HF
Raw Data (360) 1 - 0 min	0	1.1278	1.8793	1.9999	1.7399	1.7962	1.74	1.7234	1.6824	1.6441	0	0.7515	0.8721	0.6121	0.6684	0.6122	0.5956	0.5546	0.5163
Raw Data (360) 2 - 0 min 30 s	0.5	1.1276	1.8876	2.008	1.7419	1.8243	1.7562	1.7541	1.6947	1.6601	0.5	0.76	0.8804	0.6143	0.6967	0.6286	0.6265	0.5671	0.5325
Raw Data (360) 3 - 1 min	1	1.1293	1.9221	2.0391	1.7597	1.8534	1.7725	1.7799	1.7102	1.688	1	0.7928	0.9098	0.6304	0.7241	0.6432	0.6506	0.5809	0.5587
Raw Data (360) 4 - 1 min 30 s	1.5	1.132	1.9486	2.0648	1.773	1.8841	1.7788	1.8066	1.7313	1.7034	1.5	0.8166	0.9328	0.641	0.7521	0.6468	0.6746	0.5993	0.5714
Raw Data (360) 5 - 2 min	2	1.1327	1.9772	2.0896	1.7866	1.9132	1.7895	1.8334	1.7485	1.7172	2	0.8445	0.9569	0.6539	0.7805	0.6568	0.7007	0.6158	0.5845
Raw Data (360) 6 - 2 min 30 s	2.5	1.1306	2.0067	2.106	1.8035	1.9379	1.8047	1.8621	1.773	1.7397	2.5	0.8761	0.9754	0.6729	0.8073	0.6741	0.7315	0.6424	0.6091
Raw Data (360) 7 - 3 min	3	1.1406	2.0352	2.1464	1.8268	1.9729	1.8154	1.8898	1.7932	1.7565	3	0.8946	1.0058	0.6862	0.8323	0.6748	0.7492	0.6526	0.6159
Raw Data (360) 8 - 3 min 30 s	3.5	1.1389	2.0674	2.1702	1.8432	2.0084	1.8316	1.9221	1.8111	1.7797	3.5	0.9285	1.0313	0.7043	0.8695	0.6927	0.7832	0.6722	0.6408			WT	S1	S3	HF	S1 S3	S1 HF	S3 HF	S1 S3 HF
Raw Data (360) 9 - 4 min	4	1.1409	2.0905	2.1896	1.8646	2.0367	1.8377	1.9469	1.826	1.7896	4	0.9496	1.0487	0.7237	0.8958	0.6968	0.806	0.6851	0.6487		Abs/s	0.000792	0.000815	0.000661333	0.0007985	0.000457167	0.000848667	0.0006345	0.000597167	Change in absorbance per s between 5 and 15mins
Raw Data (360) 10 - 4 min 30 s	4.5	1.1397	2.1173	2.2081	1.8876	2.0645	1.8543	1.9774	1.8477	1.8093	4.5	0.9776	1.0684	0.7479	0.9248	0.7146	0.8377	0.708	0.6696		M/s	0.0792	0.0815	0.0661333	0.07985	0.0457167	0.0848667	0.06345	0.0597167	convert absorbance to molarity
Raw Data (360) 11 - 5 min	5	1.1439	2.1526	2.2475	1.912	2.098	1.8733	2.0045	1.8669	1.8294	5	1.0087	1.1036	0.7681	0.9541	0.7294	0.8606	0.723	0.6855		ATP/s	1.584	1.63	1.32267	1.597	0.914333	1.69733	1.269	1.19433	divide by concentration of cohesin
Raw Data (360) 12 - 5 min 30 s	5.5	1.15	2.1729	2.2889	1.9324	2.1198	1.8817	2.0358	1.8883	1.8558	5.5	1.0229	1.1389	0.7824	0.9698	0.7317	0.8858	0.7383	0.7058
Raw Data (360) 13 - 6 min	6	1.1479	2.2033	2.3041	1.9537	2.1488	1.8919	2.054	1.9132	1.8681	6	1.0554	1.1562	0.8058	1.0009	0.744	0.9061	0.7653	0.7202
Raw Data (360) 14 - 6 min 30 s	6.5	1.1487	2.2269	2.3559	1.9715	2.1702	1.9126	2.0844	1.9241	1.8823	6.5	1.0782	1.2072	0.8228	1.0215	0.7639	0.9357	0.7754	0.7336
Raw Data (360) 15 - 7 min	7	1.1449	2.2587	2.425	1.9907	2.1965	1.9259	2.1064	1.9478	1.9032	7	1.1138	1.2801	0.8458	1.0516	0.781	0.9615	0.8029	0.7583
Raw Data (360) 16 - 7 min 30 s	7.5	1.1498	2.2814	2.4573	2.0115	2.2252	1.9378	2.1423	1.9666	1.9235	7.5	1.1316	1.3075	0.8617	1.0754	0.788	0.9925	0.8168	0.7737
Raw Data (360) 17 - 8 min	8	1.1509	2.3036	2.4549	2.0337	2.2524	1.9502	2.1664	1.9845	1.9409	8	1.1527	1.304	0.8828	1.1015	0.7993	1.0155	0.8336	0.79
Raw Data (360) 18 - 8 min 30 s	8.5	1.1507	2.3276	2.449	2.0511	2.2763	1.966	2.1939	2.0047	1.9561	8.5	1.1769	1.2983	0.9004	1.1256	0.8153	1.0432	0.854	0.8054
Raw Data (360) 19 - 9 min	9	1.1467	2.3509	2.4669	2.0695	2.3054	1.9826	2.2194	2.0257	1.9762	9	1.2042	1.3202	0.9228	1.1587	0.8359	1.0727	0.879	0.8295
Raw Data (360) 20 - 9 min 30 s	9.5	1.1475	2.3824	2.4849	2.095	2.3314	1.9983	2.2531	2.0442	1.995	9.5	1.2349	1.3374	0.9475	1.1839	0.8508	1.1056	0.8967	0.8475
Raw Data (360) 21 - 10 min	10	1.1475	2.4018	2.5178	2.1105	2.3555	2.0076	2.2716	2.0603	2.0108	10	1.2543	1.3703	0.963	1.208	0.8601	1.1241	0.9128	0.8633
Raw Data (360) 22 - 10 min 30 s	10.5	1.1501	2.4352	2.5358	2.1323	2.3838	2.0235	2.2981	2.0876	2.0303	10.5	1.2851	1.3857	0.9822	1.2337	0.8734	1.148	0.9375	0.8802
Raw Data (360) 23 - 11 min	11	1.1524	2.4527	2.5738	2.1516	2.4023	2.0322	2.3269	2.1056	2.0524	11	1.3003	1.4214	0.9992	1.2499	0.8798	1.1745	0.9532	0.9
Raw Data (360) 24 - 11 min 30 s	11.5	1.1572	2.4847	2.6742	2.1779	2.4306	2.0537	2.3489	2.1269	2.0693	11.5	1.3275	1.517	1.0207	1.2734	0.8965	1.1917	0.9697	0.9121
Raw Data (360) 25 - 12 min	12	1.1549	2.5012	2.6901	2.1922	2.4511	2.0646	2.3757	2.1452	2.084	12	1.3463	1.5352	1.0373	1.2962	0.9097	1.2208	0.9903	0.9291
Raw Data (360) 26 - 12 min 30 s	12.5	1.1492	2.5273	2.6933	2.2178	2.4721	2.084	2.3979	2.1587	2.0979	12.5	1.3781	1.5441	1.0686	1.3229	0.9348	1.2487	1.0095	0.9487
Raw Data (360) 27 - 13 min	13	1.1561	2.5547	2.714	2.2402	2.4977	2.0987	2.423	2.1876	2.1284	13	1.3986	1.5579	1.0841	1.3416	0.9426	1.2669	1.0315	0.9723
Raw Data (360) 28 - 13 min 30 s	13.5	1.1514	2.5709	2.7184	2.2567	2.5196	2.1098	2.4506	2.2019	2.1431	13.5	1.4195	1.567	1.1053	1.3682	0.9584	1.2992	1.0505	0.9917
Raw Data (360) 29 - 14 min	14	1.1563	2.5914	2.7237	2.2791	2.5384	2.1242	2.4872	2.22	2.158	14	1.4351	1.5674	1.1228	1.3821	0.9679	1.3309	1.0637	1.0017
Raw Data (360) 30 - 14 min 30 s	14.5	1.1544	2.6123	2.7338	2.2997	2.5614	2.1404	2.5	2.2395	2.1803	14.5	1.4579	1.5794	1.1453	1.407	0.986	1.3456	1.0851	1.0259
Raw Data (360) 31 - 15 min	15	1.1519	2.6358	2.7445	2.3168	2.5851	2.1556	2.5217	2.2556	2.1957	15	1.4839	1.5926	1.1649	1.4332	1.0037	1.3698	1.1037	1.0438
Raw Data (360) 32 - 15 min 30 s	15.5	1.1599	2.6652	2.7947	2.3428	2.6083	2.1799	2.5484	2.2803	2.2239
Raw Data (360) 33 - 16 min	16	1.1591	2.6798	2.8207	2.3651	2.6259	2.1948	2.572	2.3005	2.2416
Raw Data (360) 34 - 16 min 30 s	16.5	1.1599	2.7015	2.8526	2.3817	2.6442	2.2058	2.5877	2.3183	2.2552
Raw Data (360) 35 - 17 min	17	1.157	2.7033	2.864	2.3966	2.6614	2.2149	2.6046	2.3317	2.2672
Raw Data (360) 36 - 17 min 30 s	17.5	1.1555	2.7325	2.8964	2.4198	2.6788	2.2288	2.6223	2.3534	2.2874
Raw Data (360) 37 - 18 min	18	1.1684	2.753	2.9343	2.4408	2.7003	2.2564	2.6584	2.3777	2.3101
Raw Data (360) 38 - 18 min 30 s	18.5	1.1612	2.7723	2.9194	2.4604	2.7154	2.2649	2.6873	2.3916	2.3176
Raw Data (360) 39 - 19 min	19	1.1613	2.7883	2.9108	2.4756	2.7259	2.2831	2.7286	2.4055	2.3423
Raw Data (360) 40 - 19 min 30 s	19.5	1.1631	2.7975	2.9174	2.4931	2.7496	2.2937	2.7457	2.4276	2.3604
Raw Data (360) 41 - 20 min	20	1.162	2.8094	2.9207	2.5142	2.7587	2.308	2.7339	2.4439	2.3689
Raw Data (360) 42 - 20 min 30 s	20.5	1.1587	2.8277	2.9347	2.5291	2.771	2.3234	2.7399	2.4568	2.3955
Raw Data (360) 43 - 21 min	21	1.1641	2.8401	2.9528	2.5469	2.783	2.3398	2.7517	2.4764	2.408
Raw Data (360) 44 - 21 min 30 s	21.5	1.1665	2.8553	2.9712	2.566	2.804	2.3527	2.7813	2.4966	2.4292
Raw Data (360) 45 - 22 min	22	1.168	2.879	2.9876	2.5851	2.828	2.3767	2.7972	2.5172	2.4438
Raw Data (360) 46 - 22 min 30 s	22.5	1.1662	2.8825	2.999	2.602	2.8336	2.3836	2.8072	2.5303	2.4623
Raw Data (360) 47 - 23 min	23	1.1722	2.8883	3.011	2.6238	2.8465	2.4001	2.8341	2.5514	2.4769
Raw Data (360) 48 - 23 min 30 s	23.5	1.1686	2.9046	3.0177	2.6373	2.8562	2.4178	2.8588	2.5668	2.489
Raw Data (360) 49 - 24 min	24	1.1668	2.9101	3.0351	2.6468	2.8627	2.4271	2.8813	2.5754	2.5058
Raw Data (360) 50 - 24 min 30 s	24.5	1.1695	2.9299	3.0559	2.6709	2.8835	2.4393	2.9128	2.5986	2.5184
Raw Data (360) 51 - 25 min	25	1.1651	2.9318	3.0601	2.6827	2.8823	2.457	2.9287	2.6091	2.5342
Raw Data (360) 52 - 25 min 30 s	25.5	1.1639	2.9379	3.0638	2.6933	2.8928	2.4724	2.9782	2.6237	2.5508
Raw Data (360) 53 - 26 min	26	1.1694	2.962	3.0783	2.7187	2.9209	2.4899	3.0399	2.6608	2.5717
Raw Data (360) 54 - 26 min 30 s	26.5	1.1652	2.9549	3.078	2.7274	2.9155	2.4977	3.0535	2.6871	2.5848
Raw Data (360) 55 - 27 min	27	1.1686	2.9676	3.0998	2.7441	2.9322	2.5107	3.0248	2.7082	2.5986
Raw Data (360) 56 - 27 min 30 s	27.5	1.1681	2.9737	3.1042	2.7542	2.9335	2.521	3.0088	2.7296	2.6109
Raw Data (360) 57 - 28 min	28	1.1697	2.9739	3.1166	2.7638	2.9386	2.5308	3.0006	2.7498	2.6262
Raw Data (360) 58 - 28 min 30 s	28.5	1.1695	2.9823	3.1159	2.7714	2.9432	2.54	2.9954	2.7621	2.6387
Raw Data (360) 59 - 29 min	29	1.1729	2.9929	3.1202	2.7934	2.9545	2.5616	2.9881	2.7903	2.6539
Raw Data (360) 60 - 29 min 30 s	29.5	1.1729	3.0028	3.1339	2.8105	2.9672	2.5721	2.9743	2.8147	2.658
Raw Data (360) 61 - 30 min	30	1.1742	2.9972	3.1353	2.8129	2.9658	2.5844	2.9594	2.8314	2.6834
Raw Data (360) 62 - 30 min 30 s	30.5	1.1669	3.0102	3.1424	2.8318	2.9801	2.6016	2.9705	2.8563	2.6959
Raw Data (360) 63 - 31 min	31	1.1687	3.0095	3.1404	2.8478	2.9821	2.6104	2.979	2.8524	2.7079
Raw Data (360) 64 - 31 min 30 s	31.5	1.1718	3.0099	3.1451	2.8487	2.9844	2.6242	3.0019	2.8657	2.7107
Raw Data (360) 65 - 32 min	32	1.1729	3.0237	3.1562	2.8625	2.9937	2.6352	3.0465	2.8763	2.7326
Raw Data (360) 66 - 32 min 30 s	32.5	1.1725	3.0155	3.1545	2.8759	2.9947	2.6484	3.0755	2.8782	2.7456
Raw Data (360) 67 - 33 min	33	1.1756	3.0215	3.1619	2.8822	2.9955	2.655	3.0543	2.8694	2.7496
Raw Data (360) 68 - 33 min 30 s	33.5	1.1755	3.0255	3.1687	2.8908	3.0082	2.6719	3.0207	2.8696	2.7716
Raw Data (360) 69 - 34 min	34	1.1765	3.0254	3.1738	2.8999	3.0103	2.6808	2.9971	2.8787	2.7804
Raw Data (360) 70 - 34 min 30 s	34.5	1.1777	3.0395	3.1692	2.912	3.0122	2.6993	3.0122	2.8785	2.7904
Raw Data (360) 71 - 35 min	35	1.1733	3.0271	3.171	2.9144	3.0208	2.7061	3.0128	2.874	2.7985
Raw Data (360) 72 - 35 min 30 s	35.5	1.1813	3.0272	3.185	2.9253	3.0193	2.7124	3.0133	2.8837	2.808
Raw Data (360) 73 - 36 min	36	1.1795	3.0341	3.181	2.9306	3.0182	2.7257	3.0127	2.888	2.8224
Raw Data (360) 74 - 36 min 30 s	36.5	1.1769	3.0329	3.173	2.9355	3.0176	2.7309	3.0161	2.8926	2.8192
Raw Data (360) 75 - 37 min	37	1.1728	3.0347	3.1821	2.9568	3.0238	2.7443	3.0188	2.8982	2.8339
Raw Data (360) 76 - 37 min 30 s	37.5	1.1768	3.0418	3.1909	2.9782	3.0162	2.7537	3.0239	2.9044	2.8487
Raw Data (360) 77 - 38 min	38	1.1763	3.0482	3.1904	3.0026	3.03	2.7625	3.0602	2.9119	2.8552
Raw Data (360) 78 - 38 min 30 s	38.5	1.1744	3.0443	3.1833	3.0181	3.0217	2.7732	3.1043	2.9136	2.8592
Raw Data (360) 79 - 39 min	39	1.1759	3.0395	3.1779	3.0424	3.0227	2.7784	3.1132	2.9213	2.8738
Raw Data (360) 80 - 39 min 30 s	39.5	1.1793	3.0525	3.1923	3.0745	3.0362	2.7966	3.1502	2.9353	2.8831
Raw Data (360) 81 - 40 min	40	1.18	3.0539	3.1946	3.0915	3.0355	2.8094	3.109	2.9407	2.8884
Raw Data (360) 82 - 40 min 30 s	40.5	1.1798	3.042	3.1872	3.1131	3.0307	2.8094	3.0608	2.9341	2.8945
Raw Data (360) 83 - 41 min	41	1.1795	3.0511	3.1919	3.1371	3.0383	2.813	3.0566	2.943	2.9003
Raw Data (360) 84 - 41 min 30 s	41.5	1.1818	3.0436	3.1902	3.1551	3.0404	2.8221	3.0582	2.9497	2.905
Raw Data (360) 85 - 42 min	42	1.185	3.0526	3.1991	3.1647	3.0356	2.8377	3.0733	2.9617	2.9097
Raw Data (360) 86 - 42 min 30 s	42.5	1.1828	3.0561	3.2013	3.1671	3.0372	2.8424	3.0809	2.9608	2.9212
Raw Data (360) 87 - 43 min	43	1.1803	3.0571	3.2032	3.1739	3.0459	2.8555	3.0709	2.9643	2.9217
Raw Data (360) 88 - 43 min 30 s	43.5	1.1863	3.0557	3.2002	3.1787	3.043	2.8576	3.0712	2.9604	2.929
Raw Data (360) 89 - 44 min	44	1.1823	3.0633	3.2024	3.185	3.0439	2.8592	3.066	2.9633	2.9394
Raw Data (360) 90 - 44 min 30 s	44.5	1.191	3.0656	3.2015	3.1954	3.048	2.8627	3.0557	2.9779	2.9402
Raw Data (360) 91 - 45 min	45	1.1888	3.0581	3.2116	3.2037	3.0532	2.8771	3.0575	2.9775	2.952
Raw Data (360) 92 - 45 min 30 s	45.5	1.1867	3.0572	3.2039	3.1905	3.0495	2.8733	3.0401	2.9641	2.9428
Raw Data (360) 93 - 46 min	46	1.1896	3.0577	3.2045	3.1969	3.0428	2.8811	3.0445	2.9824	2.952
Raw Data (360) 94 - 46 min 30 s	46.5	1.1913	3.0664	3.209	3.2057	3.047	2.894	3.0447	2.9862	2.9629
Raw Data (360) 95 - 47 min	47	1.1951	3.0685	3.2053	3.1975	3.0488	2.9052	3.0504	2.9856	2.9622
Raw Data (360) 96 - 47 min 30 s	47.5	1.1939	3.0593	3.2149	3.2081	3.055	2.9033	3.0511	2.9797	2.9715
Raw Data (360) 97 - 48 min	48	1.1933	3.0703	3.2277	3.2061	3.0574	2.9089	3.055	2.995	2.9732
Raw Data (360) 98 - 48 min 30 s	48.5	1.1969	3.0636	3.2317	3.2123	3.0459	2.9031	3.048	2.9901	2.9757
Raw Data (360) 99 - 49 min	49	1.1988	3.0711	3.2493	3.2114	3.0534	2.9271	3.0645	2.9959	2.9748
Raw Data (360) 100 - 49 min 30 s	49.5	1.1969	3.0664	3.2743	3.2175	3.0644	2.9248	3.0728	3.0012	2.9827
Raw Data (360) 101 - 50 min	50	1.1924	3.0553	3.2785	3.2007	3.0485	2.918	3.0728	2.9913	2.9739
Raw Data (360) 102 - 50 min 30 s	50.5	1.201	3.067	3.2839	3.2007	3.0537	2.9228	3.0634	2.9958	2.9762
Raw Data (360) 103 - 51 min	51	1.1972	3.0675	3.2813	3.2035	3.0635	2.9278	3.0547	2.9992	2.9941
Raw Data (360) 104 - 51 min 30 s	51.5	1.2024	3.0665	3.2999	3.2092	3.0621	2.9396	3.0526	3.0021	2.9876
Raw Data (360) 105 - 52 min	52	1.197	3.0721	3.3082	3.2016	3.063	2.9474	3.0539	2.9991	2.9909
Raw Data (360) 106 - 52 min 30 s	52.5	1.1995	3.0601	3.2986	3.203	3.0535	2.9447	3.052	2.9957	2.9932
Raw Data (360) 107 - 53 min	53	1.2008	3.069	3.2922	3.2147	3.0633	2.951	3.057	2.9976	2.9888
Raw Data (360) 108 - 53 min 30 s	53.5	1.2009	3.0794	3.2857	3.2092	3.0697	2.9539	3.0531	3.0063	2.995
Raw Data (360) 109 - 54 min	54	1.2009	3.068	3.2643	3.2072	3.0582	2.9544	3.0507	3.0069	2.99
Raw Data (360) 110 - 54 min 30 s	54.5	1.1987	3.0664	3.2532	3.2051	3.0655	2.9583	3.063	3.007	2.9988
Raw Data (360) 111 - 55 min	55	1.2021	3.07	3.2271	3.2097	3.0645	2.9567	3.0517	3.0021	2.9999
Raw Data (360) 112 - 55 min 30 s	55.5	1.213	3.0802	3.2272	3.2216	3.0661	2.9621	3.0555	3.0094	3.0089
Raw Data (360) 113 - 56 min	56	1.2047	3.0726	3.2247	3.2267	3.0711	2.9588	3.0525	3.0059	3.0062
Raw Data (360) 114 - 56 min 30 s	56.5	1.2087	3.0833	3.2379	3.222	3.0709	2.9752	3.0621	3.0152	3.0092
Raw Data (360) 115 - 57 min	57	1.2075	3.0784	3.2355	3.2282	3.0724	2.9656	3.0648	3.0181	3.0106
Raw Data (360) 116 - 57 min 30 s	57.5	1.2057	3.0722	3.2343	3.2171	3.0748	2.9683	3.0541	3.0115	3.0042
Raw Data (360) 117 - 58 min	58	1.2133	3.0756	3.2405	3.2206	3.0778	2.9705	3.0652	3.0085	3.0035
Raw Data (360) 118 - 58 min 30 s	58.5	1.2065	3.072	3.2407	3.2146	3.0718	2.9735	3.064	3.0014	3.004
Raw Data (360) 119 - 59 min	59	1.2127	3.0814	3.2481	3.2225	3.0696	2.9782	3.0673	3.0153	3.0135
Raw Data (360) 120 - 59 min 30 s	59.5	1.2047	3.0809	3.2519	3.2218	3.0786	2.9724	3.0618	3.0184	3.0062
