# Supplementary material for: DNA passes through cohesin’s hinge as well as its Smc3–kleisin interface
Source: eLife journal article supplement (doi:10.7554/elife.80310), 2022-08-30
Supplement: data1 [file Figure 1 - figure supplement 1C repeat 4 - source data.xls]

## Sheet: Row 1 - Row 9
User: USER			Path: C:\Program Files\BMG\PHERAstar\User\Data\							Test ID: 1925
Test Name: KASIA								Date: 23/04/2022		Time: 16:06:27
Absorbance			Absorbance values are displayed as OD
Content		Sample X10	Sample X11	Sample X12	Sample X13	Sample X14	Sample X15	Sample X16	Sample X17	Sample X18
Well Col		1	2	3	4	5	6	7	8	9
Well Row		C	C	C	C	C	C	C	C	C		WT	S1	S3	HF	S1 S3	S1 HF	S3 HF	S1 S3 HF
Raw Data (360) 1 - 0 min	0	1.0181	1.7388	1.6355	1.6348	1.6627	1.6104	1.6518	1.6209	1.6023	0	0.7207	0.6174	0.6167	0.6446	0.5923	0.6337	0.6028	0.5842
Raw Data (360) 2 - 0 min 30 s	0.5	1.0167	1.7429	1.6698	1.6538	1.6935	1.6226	1.6758	1.6396	1.6365	0.5	0.7262	0.6531	0.6371	0.6768	0.6059	0.6591	0.6229	0.6198
Raw Data (360) 3 - 1 min	1	1.021	1.7817	1.7108	1.6733	1.7286	1.6487	1.7103	1.6584	1.6674	1	0.7607	0.6898	0.6523	0.7076	0.6277	0.6893	0.6374	0.6464
Raw Data (360) 4 - 1 min 30 s	1.5	1.0215	1.8134	1.7508	1.6959	1.7624	1.6597	1.74	1.6777	1.6958	1.5	0.7919	0.7293	0.6744	0.7409	0.6382	0.7185	0.6562	0.6743
Raw Data (360) 5 - 2 min	2	1.0232	1.8546	1.783	1.7188	1.805	1.6718	1.7694	1.701	1.7274	2	0.8314	0.7598	0.6956	0.7818	0.6486	0.7462	0.6778	0.7042
Raw Data (360) 6 - 2 min 30 s	2.5	1.0276	1.8885	1.8221	1.7453	1.8382	1.688	1.797	1.7211	1.7506	2.5	0.8609	0.7945	0.7177	0.8106	0.6604	0.7694	0.6935	0.723
Raw Data (360) 7 - 3 min	3	1.0218	1.9182	1.8567	1.7668	1.8704	1.7046	1.8235	1.7374	1.7712	3	0.8964	0.8349	0.745	0.8486	0.6828	0.8017	0.7156	0.7494
Raw Data (360) 8 - 3 min 30 s	3.5	1.028	1.955	1.8928	1.7928	1.91	1.7233	1.8508	1.7629	1.7949	3.5	0.927	0.8648	0.7648	0.882	0.6953	0.8228	0.7349	0.7669			WT	S1	S3	HF	S1 S3	S1 HF	S3 HF	S1 S3 HF
Raw Data (360) 9 - 4 min	4	1.0309	1.9864	1.9291	1.8202	1.9431	1.7433	1.8816	1.7838	1.8089	4	0.9555	0.8982	0.7893	0.9122	0.7124	0.8507	0.7529	0.778		Abs/s	0.000895167	0.000979167	0.000764333	0.000969167	0.0005955	0.000781833	0.000651833	0.000567	Change in absorbance per s between 5 and 15mins
Raw Data (360) 10 - 4 min 30 s	4.5	1.03	2.0215	1.9589	1.8386	1.9705	1.7571	1.9012	1.7968	1.8333	4.5	0.9915	0.9289	0.8086	0.9405	0.7271	0.8712	0.7668	0.8033		M/s	0.0895167	0.0979167	0.0764333	0.0969167	0.05955	0.0781833	0.0651833	0.0567	convert absorbance to molarity
Raw Data (360) 11 - 5 min	5	1.0316	2.0587	1.9937	1.8711	2.0131	1.7816	1.932	1.8192	1.848	5	1.0271	0.9621	0.8395	0.9815	0.75	0.9004	0.7876	0.8164		ATP/s	1.79033	1.95833	1.52867	1.93833	1.191	1.56367	1.30367	1.134	divide by concentration of cohesin
Raw Data (360) 12 - 5 min 30 s	5.5	1.034	2.0908	2.0277	1.8931	2.0513	1.7978	1.9651	1.8475	1.8702	5.5	1.0568	0.9937	0.8591	1.0173	0.7638	0.9311	0.8135	0.8362
Raw Data (360) 13 - 6 min	6	1.0374	2.1274	2.0609	1.9148	2.0802	1.8177	1.9872	1.8628	1.8937	6	1.09	1.0235	0.8774	1.0428	0.7803	0.9498	0.8254	0.8563
Raw Data (360) 14 - 6 min 30 s	6.5	1.0393	2.1598	2.0999	1.9443	2.1196	1.8369	2.0148	1.8886	1.9151	6.5	1.1205	1.0606	0.905	1.0803	0.7976	0.9755	0.8493	0.8758
Raw Data (360) 15 - 7 min	7	1.0368	2.1902	2.1324	1.9672	2.1495	1.8517	2.0412	1.9058	1.9307	7	1.1534	1.0956	0.9304	1.1127	0.8149	1.0044	0.869	0.8939
Raw Data (360) 16 - 7 min 30 s	7.5	1.0404	2.2225	2.1624	1.993	2.1794	1.8692	2.0673	1.9264	1.9461	7.5	1.1821	1.122	0.9526	1.139	0.8288	1.0269	0.886	0.9057
Raw Data (360) 17 - 8 min	8	1.0368	2.2492	2.1954	2.012	2.2143	1.8933	2.0949	1.9468	1.9683	8	1.2124	1.1586	0.9752	1.1775	0.8565	1.0581	0.91	0.9315
Raw Data (360) 18 - 8 min 30 s	8.5	1.0402	2.2863	2.227	2.0465	2.2487	1.9066	2.1227	1.971	1.9894	8.5	1.2461	1.1868	1.0063	1.2085	0.8664	1.0825	0.9308	0.9492
Raw Data (360) 19 - 9 min	9	1.0411	2.3089	2.2574	2.0662	2.2748	1.9262	2.1408	1.989	1.9989	9	1.2678	1.2163	1.0251	1.2337	0.8851	1.0997	0.9479	0.9578
Raw Data (360) 20 - 9 min 30 s	9.5	1.0437	2.3453	2.2925	2.09	2.3055	1.9482	2.1724	2.0057	2.0241	9.5	1.3016	1.2488	1.0463	1.2618	0.9045	1.1287	0.962	0.9804
Raw Data (360) 21 - 10 min	10	1.0424	2.3696	2.321	2.1129	2.3468	1.9721	2.1995	2.0343	2.043	10	1.3272	1.2786	1.0705	1.3044	0.9297	1.1571	0.9919	1.0006
Raw Data (360) 22 - 10 min 30 s	10.5	1.0396	2.3934	2.3452	2.1347	2.365	1.9826	2.2157	2.0469	2.0542	10.5	1.3538	1.3056	1.0951	1.3254	0.943	1.1761	1.0073	1.0146
Raw Data (360) 23 - 11 min	11	1.0438	2.427	2.3767	2.1675	2.3997	1.999	2.2434	2.07	2.0765	11	1.3832	1.3329	1.1237	1.3559	0.9552	1.1996	1.0262	1.0327
Raw Data (360) 24 - 11 min 30 s	11.5	1.0447	2.4539	2.4185	2.1921	2.4245	2.0283	2.2734	2.098	2.0941	11.5	1.4092	1.3738	1.1474	1.3798	0.9836	1.2287	1.0533	1.0494
Raw Data (360) 25 - 12 min	12	1.0485	2.4728	2.4383	2.2096	2.4542	2.0463	2.2883	2.1143	2.1096	12	1.4243	1.3898	1.1611	1.4057	0.9978	1.2398	1.0658	1.0611
Raw Data (360) 26 - 12 min 30 s	12.5	1.0445	2.4996	2.4662	2.2367	2.4827	2.0624	2.3106	2.132	2.1282	12.5	1.4551	1.4217	1.1922	1.4382	1.0179	1.2661	1.0875	1.0837
Raw Data (360) 27 - 13 min	13	1.049	2.5268	2.4936	2.2584	2.5123	2.0841	2.3296	2.1463	2.1432	13	1.4778	1.4446	1.2094	1.4633	1.0351	1.2806	1.0973	1.0942
Raw Data (360) 28 - 13 min 30 s	13.5	1.0488	2.5458	2.5198	2.2854	2.5407	2.1009	2.3594	2.1707	2.1588	13.5	1.497	1.471	1.2366	1.4919	1.0521	1.3106	1.1219	1.11
Raw Data (360) 29 - 14 min	14	1.0505	2.5755	2.5451	2.3026	2.5706	2.1231	2.3763	2.1913	2.1751	14	1.525	1.4946	1.2521	1.5201	1.0726	1.3258	1.1408	1.1246
Raw Data (360) 30 - 14 min 30 s	14.5	1.056	2.6026	2.579	2.3327	2.5936	2.1481	2.4008	2.2153	2.1998	14.5	1.5466	1.523	1.2767	1.5376	1.0921	1.3448	1.1593	1.1438
Raw Data (360) 31 - 15 min	15	1.0553	2.6195	2.6049	2.3534	2.6183	2.1626	2.4248	2.234	2.2119	15	1.5642	1.5496	1.2981	1.563	1.1073	1.3695	1.1787	1.1566
Raw Data (360) 32 - 15 min 30 s	15.5	1.0507	2.6433	2.6293	2.376	2.6424	2.1789	2.4392	2.2497	2.2282
Raw Data (360) 33 - 16 min	16	1.0543	2.66	2.6529	2.3943	2.6625	2.1974	2.4569	2.2731	2.2454
Raw Data (360) 34 - 16 min 30 s	16.5	1.0592	2.6853	2.6781	2.4219	2.6848	2.2157	2.4809	2.2973	2.2634
Raw Data (360) 35 - 17 min	17	1.0567	2.6992	2.6896	2.4387	2.7037	2.2381	2.4938	2.3102	2.2807
Raw Data (360) 36 - 17 min 30 s	17.5	1.0578	2.723	2.7211	2.4601	2.7251	2.255	2.5203	2.3285	2.2963
Raw Data (360) 37 - 18 min	18	1.0525	2.7382	2.744	2.4834	2.7503	2.2732	2.5305	2.3406	2.3138
Raw Data (360) 38 - 18 min 30 s	18.5	1.0625	2.7569	2.7615	2.5012	2.7678	2.2913	2.5483	2.3663	2.3287
Raw Data (360) 39 - 19 min	19	1.0592	2.7818	2.7887	2.5272	2.7796	2.313	2.572	2.3839	2.3511
Raw Data (360) 40 - 19 min 30 s	19.5	1.0607	2.8128	2.8052	2.5475	2.807	2.3313	2.5912	2.4037	2.3706
Raw Data (360) 41 - 20 min	20	1.0537	2.8201	2.8124	2.5581	2.8111	2.3452	2.5944	2.4127	2.3755
Raw Data (360) 42 - 20 min 30 s	20.5	1.0645	2.8585	2.8369	2.5921	2.83	2.3709	2.6125	2.4364	2.4014
Raw Data (360) 43 - 21 min	21	1.0587	2.8662	2.8442	2.5969	2.8431	2.3804	2.6246	2.4481	2.4023
Raw Data (360) 44 - 21 min 30 s	21.5	1.0641	2.8914	2.8688	2.6251	2.8609	2.4041	2.6446	2.4704	2.4278
Raw Data (360) 45 - 22 min	22	1.0617	2.9071	2.8747	2.6428	2.8716	2.4146	2.6638	2.4863	2.4451
Raw Data (360) 46 - 22 min 30 s	22.5	1.0665	2.9237	2.8882	2.6584	2.8876	2.4329	2.6759	2.5006	2.4586
Raw Data (360) 47 - 23 min	23	1.0685	2.9419	2.9084	2.6879	2.896	2.4554	2.6872	2.5227	2.48
Raw Data (360) 48 - 23 min 30 s	23.5	1.0689	2.9525	2.9196	2.7051	2.9037	2.4686	2.6897	2.53	2.4923
Raw Data (360) 49 - 24 min	24	1.069	2.9592	2.9346	2.7249	2.9169	2.4893	2.7086	2.5548	2.5118
Raw Data (360) 50 - 24 min 30 s	24.5	1.066	2.959	2.9374	2.7361	2.9195	2.4969	2.7168	2.5593	2.5148
Raw Data (360) 51 - 25 min	25	1.0638	2.963	2.9442	2.7624	2.9214	2.5132	2.7302	2.5789	2.5345
Raw Data (360) 52 - 25 min 30 s	25.5	1.0677	2.9714	2.9518	2.7796	2.9319	2.5309	2.7456	2.5883	2.5471
Raw Data (360) 53 - 26 min	26	1.0677	2.9782	2.9628	2.7927	2.9478	2.5466	2.7553	2.6044	2.5599
Raw Data (360) 54 - 26 min 30 s	26.5	1.0728	2.9856	2.9721	2.8191	2.9536	2.5644	2.7701	2.6234	2.5808
Raw Data (360) 55 - 27 min	27	1.0691	2.9832	2.9784	2.8312	2.9549	2.5773	2.7769	2.638	2.5905
Raw Data (360) 56 - 27 min 30 s	27.5	1.0689	2.9927	2.9912	2.8454	2.9672	2.5938	2.7896	2.651	2.6079
Raw Data (360) 57 - 28 min	28	1.0718	2.9906	2.991	2.8622	2.9677	2.6094	2.8008	2.6602	2.6169
Raw Data (360) 58 - 28 min 30 s	28.5	1.0757	2.9973	3.0044	2.8844	2.9756	2.6301	2.81	2.6794	2.6343
Raw Data (360) 59 - 29 min	29	1.076	3.0028	3.0067	2.8999	2.9822	2.6361	2.82	2.6915	2.6561
Raw Data (360) 60 - 29 min 30 s	29.5	1.0766	3.0048	3.0024	2.8972	2.9774	2.6466	2.8178	2.7026	2.6576
Raw Data (360) 61 - 30 min	30	1.0702	3.0157	3.0129	2.9157	2.9844	2.6585	2.8331	2.7185	2.6746
Raw Data (360) 62 - 30 min 30 s	30.5	1.0708	3.016	3.0153	2.9224	2.9844	2.6715	2.8448	2.7258	2.6853
Raw Data (360) 63 - 31 min	31	1.0762	3.0289	3.0273	2.9402	2.9913	2.6889	2.8504	2.7355	2.7005
Raw Data (360) 64 - 31 min 30 s	31.5	1.0738	3.0128	3.0159	2.9357	2.9824	2.693	2.8542	2.7453	2.707
Raw Data (360) 65 - 32 min	32	1.0766	3.0206	3.0298	2.9556	2.9962	2.7024	2.8642	2.7593	2.7195
Raw Data (360) 66 - 32 min 30 s	32.5	1.0771	3.0247	3.0241	2.962	2.9933	2.7194	2.8677	2.7716	2.727
Raw Data (360) 67 - 33 min	33	1.0757	3.0263	3.0216	2.9719	2.9942	2.7248	2.8784	2.7811	2.7417
Raw Data (360) 68 - 33 min 30 s	33.5	1.0761	3.0299	3.0345	2.9857	2.9974	2.7399	2.8858	2.7773	2.7527
Raw Data (360) 69 - 34 min	34	1.0795	3.0366	3.0397	2.9962	3.0026	2.7569	2.898	2.7948	2.7696
Raw Data (360) 70 - 34 min 30 s	34.5	1.0786	3.0403	3.0381	2.9951	2.9968	2.7601	2.8908	2.8047	2.7705
Raw Data (360) 71 - 35 min	35	1.0802	3.0358	3.0304	2.993	2.9946	2.77	2.9048	2.814	2.7771
Raw Data (360) 72 - 35 min 30 s	35.5	1.0855	3.047	3.0443	3.0126	3.0093	2.7936	2.914	2.8244	2.804
Raw Data (360) 73 - 36 min	36	1.0846	3.0453	3.0481	3.0127	3.0154	2.7885	2.9115	2.8325	2.8013
Raw Data (360) 74 - 36 min 30 s	36.5	1.0823	3.0406	3.0423	3.0223	3.008	2.8035	2.9205	2.8381	2.8114
Raw Data (360) 75 - 37 min	37	1.0833	3.0464	3.0417	3.0255	3.0125	2.813	2.9284	2.8425	2.8153
Raw Data (360) 76 - 37 min 30 s	37.5	1.0812	3.0463	3.0407	3.0246	3.0134	2.8204	2.9286	2.8479	2.8274
Raw Data (360) 77 - 38 min	38	1.0849	3.045	3.0426	3.0275	3.0101	2.8265	2.9395	2.858	2.8385
Raw Data (360) 78 - 38 min 30 s	38.5	1.0848	3.0527	3.0403	3.0408	3.009	2.8399	2.9397	2.8674	2.8446
Raw Data (360) 79 - 39 min	39	1.0828	3.0504	3.0583	3.0413	3.0106	2.8371	2.9438	2.8699	2.842
Raw Data (360) 80 - 39 min 30 s	39.5	1.0816	3.0504	3.0563	3.0455	3.0093	2.8463	2.9464	2.8781	2.8515
Raw Data (360) 81 - 40 min	40	1.0805	3.0399	3.0475	3.0389	3.0104	2.8457	2.9414	2.8761	2.8503
Raw Data (360) 82 - 40 min 30 s	40.5	1.0849	3.053	3.0431	3.0545	3.0091	2.8566	2.9434	2.8849	2.8697
Raw Data (360) 83 - 41 min	41	1.0889	3.0604	3.0607	3.0543	3.0154	2.8678	2.9586	2.8863	2.8802
Raw Data (360) 84 - 41 min 30 s	41.5	1.0879	3.0605	3.057	3.0543	3.019	2.871	2.9545	2.8908	2.8826
Raw Data (360) 85 - 42 min	42	1.0857	3.0507	3.0512	3.0555	3.0094	2.8725	2.9665	2.8941	2.893
Raw Data (360) 86 - 42 min 30 s	42.5	1.0876	3.0601	3.0491	3.0662	3.0105	2.8825	2.9703	2.8964	2.8923
Raw Data (360) 87 - 43 min	43	1.0867	3.0597	3.0541	3.063	3.0182	2.8895	2.9638	2.9044	2.8992
Raw Data (360) 88 - 43 min 30 s	43.5	1.0866	3.0523	3.0456	3.0533	3.0107	2.8908	2.9548	2.8932	2.8949
Raw Data (360) 89 - 44 min	44	1.0893	3.0657	3.0548	3.0707	3.0223	2.9039	2.9737	2.9155	2.9072
Raw Data (360) 90 - 44 min 30 s	44.5	1.0856	3.055	3.0579	3.066	3.0201	2.9003	2.9627	2.9165	2.9056
Raw Data (360) 91 - 45 min	45	1.0892	3.0614	3.0575	3.0603	3.0312	2.9132	2.9743	2.9252	2.9169
Raw Data (360) 92 - 45 min 30 s	45.5	1.0886	3.0569	3.0565	3.0603	3.0217	2.9124	2.9725	2.9203	2.9084
Raw Data (360) 93 - 46 min	46	1.0918	3.0588	3.0529	3.0634	3.0208	2.9156	2.9653	2.9221	2.9167
Raw Data (360) 94 - 46 min 30 s	46.5	1.09	3.0645	3.0582	3.0706	3.026	2.9185	2.9813	2.9322	2.9192
Raw Data (360) 95 - 47 min	47	1.0861	3.0663	3.0511	3.0702	3.0232	2.9194	2.9739	2.9297	2.9213
Raw Data (360) 96 - 47 min 30 s	47.5	1.0907	3.0611	3.0581	3.0739	3.0217	2.9279	2.9809	2.9311	2.9315
Raw Data (360) 97 - 48 min	48	1.0919	3.0624	3.0553	3.067	3.0172	2.9228	2.9695	2.9404	2.93
Raw Data (360) 98 - 48 min 30 s	48.5	1.0914	3.065	3.0636	3.0705	3.0276	2.9274	2.9789	2.9339	2.9359
Raw Data (360) 99 - 49 min	49	1.0921	3.0645	3.0653	3.0688	3.0199	2.9263	2.9817	2.9339	2.9277
Raw Data (360) 100 - 49 min 30 s	49.5	1.0982	3.07	3.07	3.0683	3.0327	2.9382	2.9789	2.9448	2.9387
Raw Data (360) 101 - 50 min	50	1.1005	3.0756	3.0739	3.0841	3.0389	2.9462	2.9902	2.9518	2.9503
Raw Data (360) 102 - 50 min 30 s	50.5	1.0991	3.0743	3.0691	3.0778	3.0439	2.95	2.9877	2.948	2.9548
Raw Data (360) 103 - 51 min	51	1.0942	3.0679	3.0585	3.0715	3.0259	2.9406	2.974	2.9385	2.9402
Raw Data (360) 104 - 51 min 30 s	51.5	1.0948	3.0586	3.0494	3.0668	3.0164	2.9347	2.9708	2.939	2.9392
Raw Data (360) 105 - 52 min	52	1.0954	3.0745	3.0681	3.0787	3.0276	2.943	2.9792	2.9466	2.9502
Raw Data (360) 106 - 52 min 30 s	52.5	1.0931	3.0679	3.0609	3.0679	3.0265	2.9422	2.9823	2.9426	2.9462
Raw Data (360) 107 - 53 min	53	1.1047	3.074	3.064	3.0796	3.0372	2.9495	2.9879	2.9516	2.955
Raw Data (360) 108 - 53 min 30 s	53.5	1.0979	3.0727	3.062	3.0745	3.0319	2.9519	2.9753	2.9581	2.9561
Raw Data (360) 109 - 54 min	54	1.0986	3.0683	3.0569	3.0718	3.0242	2.947	2.9759	2.9509	2.9455
Raw Data (360) 110 - 54 min 30 s	54.5	1.0974	3.0785	3.0656	3.0718	3.0306	2.9465	2.9766	2.9512	2.9509
Raw Data (360) 111 - 55 min	55	1.102	3.0885	3.0736	3.0863	3.0384	2.9573	2.9813	2.9651	2.9749
Raw Data (360) 112 - 55 min 30 s	55.5	1.0984	3.074	3.0647	3.0763	3.0342	2.9477	2.9757	2.9544	2.9501
Raw Data (360) 113 - 56 min	56	1.1009	3.0729	3.0614	3.0834	3.0361	2.9589	2.9801	2.9571	2.9556
Raw Data (360) 114 - 56 min 30 s	56.5	1.1017	3.0737	3.0697	3.0782	3.0333	2.9582	2.9819	2.9576	2.9613
Raw Data (360) 115 - 57 min	57	1.0987	3.0697	3.0686	3.0769	3.0289	2.9556	2.9824	2.959	2.9559
Raw Data (360) 116 - 57 min 30 s	57.5	1.1019	3.077	3.0661	3.0812	3.0317	2.9537	2.9809	2.9595	2.9602
Raw Data (360) 117 - 58 min	58	1.1052	3.0795	3.0756	3.0838	3.0308	2.9663	2.9851	2.9608	2.9678
Raw Data (360) 118 - 58 min 30 s	58.5	1.0996	3.0664	3.0591	3.0709	3.0312	2.9474	2.9723	2.9543	2.9546
Raw Data (360) 119 - 59 min	59	1.1012	3.0687	3.0697	3.0814	3.0249	2.9513	2.9725	2.9587	2.9606
Raw Data (360) 120 - 59 min 30 s	59.5	1.0993	3.0734	3.0672	3.073	3.0345	2.9586	2.9735	2.9532	2.9614
